# Supplementary material for: MMS observations of energetic oxygen ions at the low-latitude duskside magnetopause during intense substorms
Source: Copernicus journal article supplement (doi:10.5194/angeo-2019-90), 2019-07-12
Supplement: Supplementary file [file angeo-2019-90-AC1-supplement.pdf]

| Date                   | N <sub>0</sub> <sup>+</sup> (1-30keV) | N <sub>H</sub> <sup>+</sup> (HPCA) | Ni (FPI) | Position |        |        | AE index | IMF    |        |        | Solar wind |          |          |
|------------------------|---------------------------------------|------------------------------------|----------|----------|--------|--------|----------|--------|--------|--------|------------|----------|----------|
|                        |                                       |                                    |          | Rx       | Ry     | Rz     |          | Bx     | By     | Bz     | Density    | Pressure | Velocity |
| 2015-10-03/07:20-07:35 | 0.0852                                | 8.665                              | 8.059    | 7.924    | 5.148  | -3.039 | 530.188  | -6.693 | 6.429  | -5.050 | 5.447      | 1.711    | 395.821  |
| 2015-10-03/15:30-15:35 | 0.019                                 | 15.300                             | 15.185   | 5.831    | 8.840  | -5.035 | 775.500  | -4.737 | -3.845 | -3.942 | 8.595      | 2.385    | 372.150  |
| 2015-10-04/09:20-09:30 | 0.066                                 | 3.884                              | 2.794    | 8.147    | 6.287  | -4.297 | 551.818  | -7.468 | 5.159  | -0.552 | 2.159      | 0.994    | 480.000  |
| 2015-10-08/16:38-16:42 | 0.034                                 | 4.557                              | 2.886    | 5.485    | 8.621  | -4.418 | 697.600  | -0.558 | -0.594 | -5.338 | 1.827      | 2.023    | 744.100  |
| 2015-10-09/15:05-15:10 | 0.019                                 | 4.821                              | 3.139    | 6.614    | 8.263  | -4.885 | 953.833  | -4.038 | -2.435 | -0.082 | 2.552      | 2.116    | 644.040  |
| 2015-10-10/07:10-07:15 | 0.022                                 | 2.200                              | 1.614    | 8.680    | 4.768  | -2.840 | 780.667  | -5.092 | 0.693  | -2.348 | 1.270      | 0.923    | 603.633  |
| 2015-10-18/15:05-15:10 | 0.204                                 | 6.609                              | 5.206    | 7.268    | 7.504  | -4.396 | 602.000  | -3.403 | 0.423  | -3.292 | 4.763      | 1.938    | 451.433  |
| 2015-11-08/14:20-14:25 | 0.093                                 | 4.629                              | 3.299    | 8.552    | 5.343  | -3.136 | 624.167  | -6.512 | 6.132  | -3.520 | 2.970      | 1.213    | 451.500  |
| 2015-11-16/14:20-14:25 | 0.179                                 | 10.410                             | 11.197   | 8.490    | 4.580  | -2.588 | 873.667  | -3.225 | 3.158  | -5.740 | 5.497      | 1.458    | 364.167  |
| 2016-09-26/13:40-13:45 | 0.035                                 | 4.052                              | 4.196    | 3.195    | 7.324  | -5.318 | 517.500  | -4.700 | 4.693  | -6.038 | 9.015      | 3.153    | 418.117  |
| 2016-09-28/21:15-21:20 | 0.077                                 | 1.753                              | 1.862    | -0.244   | 11.499 | -2.821 | 613.667  | -4.660 | 4.937  | 2.095  | 4.138      | 3.760    | 673.383  |
| 2016-09-29/16:10-16:15 | 0.009                                 | 2.705                              | 2.909    | 2.494    | 9.773  | -5.082 | 832.667  | -5.688 | 0.307  | -0.010 | 2.430      | 2.123    | 661.833  |
| 2016-09-30/18:15-18:20 | 0.007                                 | 1.660                              | 1.586    | 1.602    | 11.027 | -4.141 | 1034.670 | 0.817  | 4.380  | -1.263 | 2.947      | 2.217    | 613.200  |
| 2016-10-01/19:00-19:05 | 0.008                                 | 4.288                              | 4.183    | 1.344    | 11.294 | -3.720 | 818.333  | -4.800 | 3.188  | 0.455  | 3.370      | 1.950    | 537.850  |
| 2016-10-02/19:45-19:50 | 0.007                                 | 2.386                              | 2.480    | 1.076    | 11.445 | -3.302 | 601.000  | -2.505 | 0.973  | -3.748 | 4.390      | 2.417    | 524.867  |

|                        |       |        |        |       |        |        |         |        |         |        |        |       |         |
|------------------------|-------|--------|--------|-------|--------|--------|---------|--------|---------|--------|--------|-------|---------|
| 2016-10-02/20:45-20:50 | 0.013 | 3.459  | 3.413  | 0.536 | 11.487 | -2.847 | 754.500 | -3.813 | 4.267   | -2.760 | 4.970  | 2.652 | 516.450 |
| 2016-10-10/19:05-19:10 | 0.019 | 10.806 | 13.691 | 2.444 | 11.242 | -3.219 | 515.000 | -1.855 | -5.317  | -3.577 | 16.104 | 4.380 | 369.100 |
| 2016-10-16/19:15-19:20 | 0.010 | 2.132  | 2.012  | 3.088 | 11.085 | -2.730 | 511.000 | 1.180  | -1.388  | -4.505 | 3.332  | 3.363 | 710.517 |
| 2016-10-24/17:00-17:05 | 0.013 | 10.222 | 12.095 | 5.228 | 10.248 | -3.330 | 615.167 | -4.968 | -2.340  | 3.475  | 7.186  | 2.084 | 380.940 |
| 2016-10-25/19:35-19:40 | 0.110 | 3.711  | 3.400  | 3.871 | 10.630 | -1.845 | 533.833 | -7.228 | -2.135  | -2.095 | 4.784  | 4.426 | 679.940 |
| 2016-10-26/20:30-20:35 | 0.077 | 1.376  | 1.193  | 3.352 | 10.428 | -1.329 | 611.667 | -3.675 | 1.825   | 2.790  | 3.005  | 2.458 | 639.425 |
| 2016-10-27/09:55-10:00 | 0.039 | 1.300  | 1.298  | 7.079 | 5.093  | -3.753 | 602.000 | -1.590 | 1.937   | -4.925 | 2.700  | 2.018 | 611.117 |
| 2016-10-27/13:20-13:25 | 0.007 | 4.775  | 4.795  | 6.941 | 8.013  | -4.363 | 857.000 | -4.160 | 1.272   | 1.738  | 2.403  | 1.482 | 555.067 |
| 2016-10-30/10:38-10:42 | 0.041 | 6.775  | 6.563  | 7.540 | 5.815  | -3.895 | 590.200 | 0.768  | 5.598   | -1.040 | 2.574  | 1.958 | 616.600 |
| 2016-10-30/14:19-14:24 | 0.027 | 2.397  | 2.296  | 7.037 | 8.650  | -3.938 | 689.500 | -2.507 | 5.683   | -0.323 | 1.985  | 1.280 | 568.500 |
| 2016-11-01/14:25-14:30 | 0.026 | 4.780  | 4.791  | 7.238 | 8.656  | -3.735 | 825.500 | -5.298 | 3.512   | -2.667 | 4.002  | 1.678 | 457.800 |
| 2016-11-03/15:00-15:05 | 0.013 | 9.040  | 11.733 | 7.255 | 8.917  | -3.352 | 538.833 | -3.302 | 1.390   | -4.557 | 5.715  | 1.705 | 386.300 |
| 2016-11-10/18:00-18:05 | 0.099 | 10.036 | 12.326 | 6.326 | 9.367  | -1.185 | 505.833 | 4.717  | -12.147 | -3.753 | 11.032 | 3.937 | 422.333 |
| 2016-11-24/18:34-18:39 | 0.146 | 12.607 | 14.226 | 6.552 | 7.823  | 0.411  | 980.333 | -4.878 | 8.120   | 4.402  | 9.498  | 4.230 | 471.733 |
| 2016-12-09/17:55-18:00 | 0.066 | 14.206 | 16.218 | 7.119 | 5.964  | 1.317  | 867.000 | 2.483  | -4.498  | -2.842 | 3.253  | 2.928 | 670.817 |
| 2016-12-26/15:00-15:05 | 0.013 | 12.586 | 14.316 | 9.381 | 3.479  | 3.479  | 793.000 | -4.730 | 0.708   | -1.826 | 2.875  | 2.380 | 643.100 |
